# Supplementary material for: Self-metathesis of 1-butene to propene over SBA-15-supported WO3
Source: Royal Society of Chemistry journal article supplement (doi:10.1039/c6cy00248j), 2016-01-01
Supplement: c6cy00248j1.pdf [file c6cy00248j1.pdf]

**Electronic supplementary information (ESI) for the manuscript:**

**Self-metathesis of 1-butene to propene over SBA-15-supported WO<sub>3</sub>**

Gang Chen,<sup>a,b</sup> Mei Dong,<sup>\*a</sup> Junfen Li,<sup>a</sup> Zhiwei Wu,<sup>a</sup> Guofu Wang,<sup>a</sup> Zhangfeng Qin,<sup>a</sup> Jianguo Wang,<sup>a</sup> and Weibin Fan<sup>\*a</sup>

<sup>a</sup>*State Key Laboratory of Coal Conversion, Institute of Coal Chemistry, Chinese Academy of Sciences, P.O. Box 165, Taiyuan, Shanxi 030001, PR China*

<sup>b</sup>*Graduate University of the Chinese Academy of Sciences, Beijing 100049, China*

\* Corresponding author: fanwb@sxicc.ac.cn, mdong@sxicc.ac.cn

**Table of contents**

- **Table S1.** H<sub>2</sub>-TPR quantitative analysis results of WO<sub>3</sub>-containing catalysts.
- **Fig. S1.** Small-angle XRD patterns of SBA-15, WO<sub>3</sub>/SBA-15, WO<sub>3</sub>/SBA-15-700 and WO<sub>3</sub>-SBA-15-700.
- **Fig. S2.** Small-angle XRD patterns of WO<sub>3</sub>-SBA-15-x (x represents the calcination temperature, °C).
- **Fig. S3.** N<sub>2</sub> adsorption/desorption isotherms of SBA-15, WO<sub>3</sub>/SBA-15, WO<sub>3</sub>/SBA-15-700 and WO<sub>3</sub>-SBA-15-700.
- **Fig. S4.** Pore size distribution of SBA-15, WO<sub>3</sub>/SBA-15, WO<sub>3</sub>/SBA-15-700 and WO<sub>3</sub>-SBA-15-700.
- **Fig. S5.** N<sub>2</sub> adsorption/desorption isotherms of WO<sub>3</sub>-SBA-15-x (x represents the calcination temperature, °C).
- **Fig. S6.** Pore size distributions of WO<sub>3</sub>-SBA-15-x (x represents the calcination temperature, °C).
- **Fig. S7.** 2-Butene/1-butene ratios obtained at different reaction time over WO<sub>3</sub>-SBA-15-700 (■) and its reduced counterpart in H<sub>2</sub> at 550 °C for 3 h (●) (reaction conditions: 350 °C, 0.1 MPa, WHSV=1 h<sup>-1</sup>).
- **Fig. S8.** Relationships between 1-butene conversion and Brønsted acid amount of WO<sub>3</sub>-SBA-15-x samples.

- **Scheme S1.** Pathway for formation of formaldehyde and  $W=CHCH_2CH_3$  species over  $WO_3$ -SBA-15-700.
- **Scheme S2.** Pathway for formation of acetaldehyde and  $W=CHCH_3$  species over  $WO_3$ -SBA-15-700.
- **Scheme S3.** Pathway for formation of propylaldehyde and  $W=CH_2$  species over  $WO_3$ -SBA-15-700.

**Table S1.** H<sub>2</sub>-TPR quantitative analysis results of WO<sub>3</sub>-containing catalysts.

| Samples                     | Peak position(°C) | H <sub>2</sub> uptake (μmol/g) | Theoretical H <sub>2</sub> uptake (μmol/g) <sup>a</sup> | Reduction degree |
|-----------------------------|-------------------|--------------------------------|---------------------------------------------------------|------------------|
| WO <sub>3</sub> /SBA-15     | 730,773           | 800.5                          | 2566.9                                                  | 31.19%           |
| WO <sub>3</sub> /SBA-15-700 | 648, 721, 781     | 1291.4                         | 2506.5                                                  | 52.52%           |
| WO <sub>3</sub> -SBA-15-700 | 457, 609, 732     | 453.9                          | 2390.7                                                  | 18.99%           |

<sup>a</sup>Theoretical H<sub>2</sub> uptake was determined as the quantity of H<sub>2</sub> required for the total reduction of WO<sub>3</sub> in the catalysts to W<sup>0</sup>.

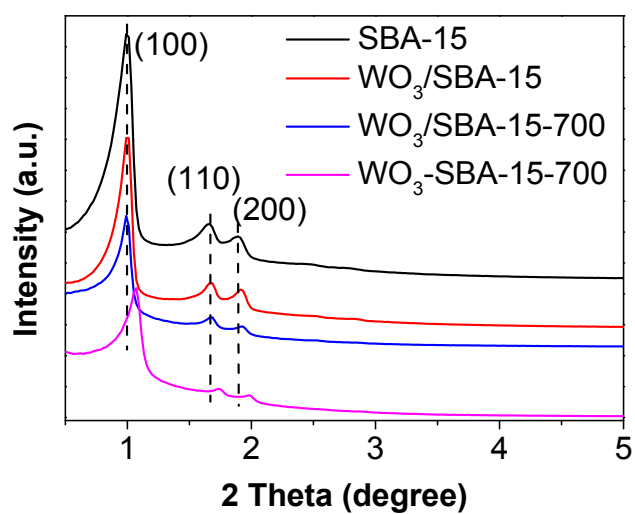

**Fig. S1.** Small-angle XRD patterns of SBA-15,  $\text{WO}_3/\text{SBA-15}$ ,  $\text{WO}_3/\text{SBA-15-700}$  and  $\text{WO}_3\text{-SBA-15-700}$ .

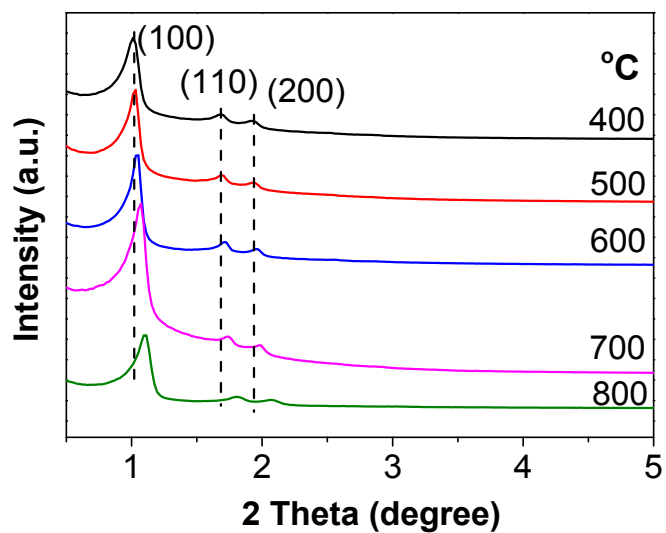

**Fig. S2.** Small-angle XRD patterns of  $\text{WO}_3\text{-SBA-15-x}$  (x represents the calcination temperature, °C).

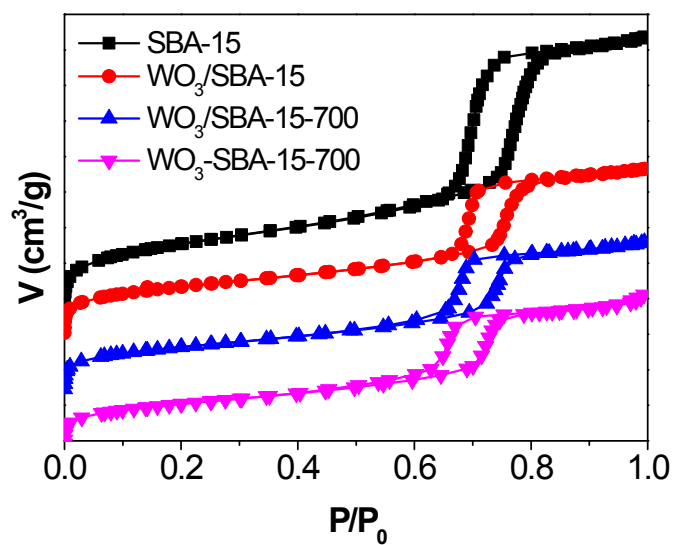

**Fig. S3.**  $\text{N}_2$  adsorption/desorption isotherms of SBA-15,  $\text{WO}_3/\text{SBA-15}$ ,  $\text{WO}_3/\text{SBA-15-700}$  and  $\text{WO}_3\text{-SBA-15-700}$ .

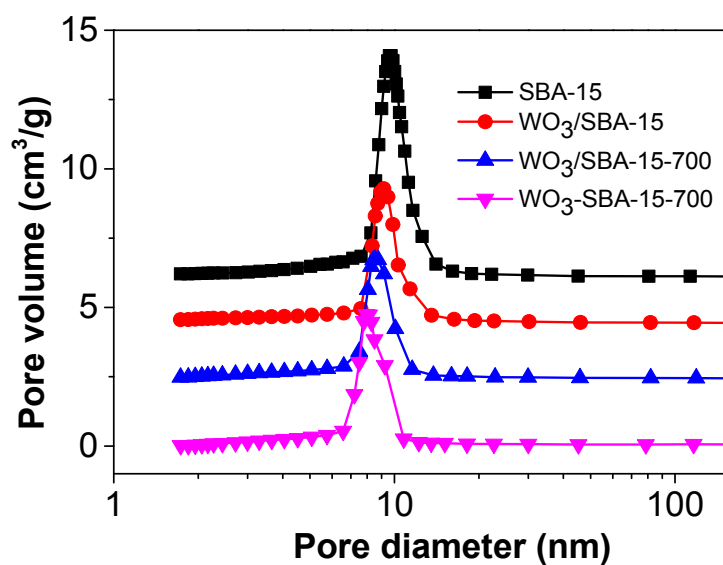

**Fig. S4.** Pore size distribution of SBA-15,  $\text{WO}_3/\text{SBA-15}$ ,  $\text{WO}_3/\text{SBA-15-700}$  and  $\text{WO}_3\text{-SBA-15-700}$ .

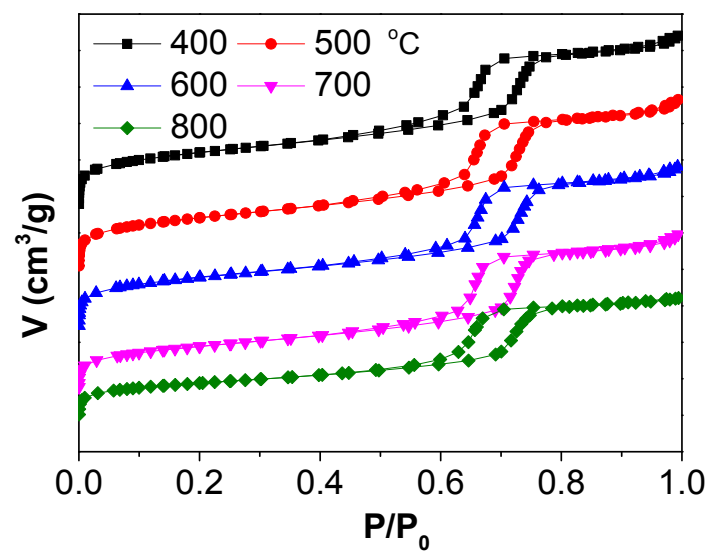

**Fig. S5.** N<sub>2</sub> adsorption/desorption isotherms of WO<sub>3</sub>-SBA-15-x (x represents the calcination temperature, °C).

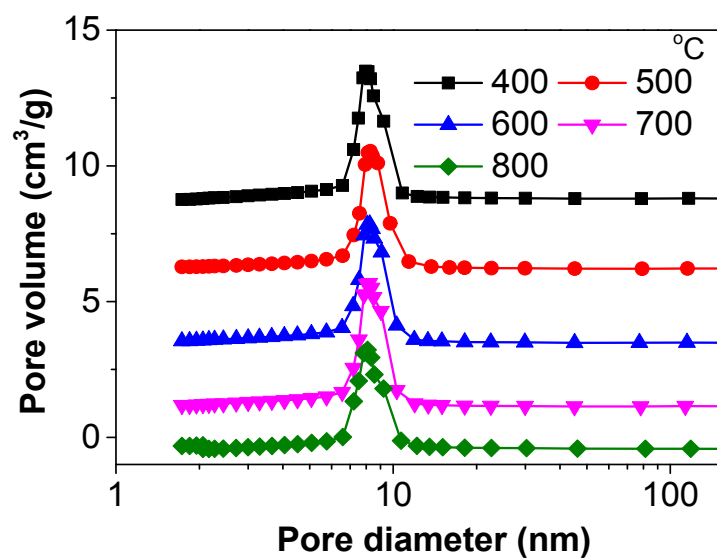

**Fig. S6.** Pore size distributions of WO<sub>3</sub>-SBA-15-x (x represents the calcination temperature, °C).

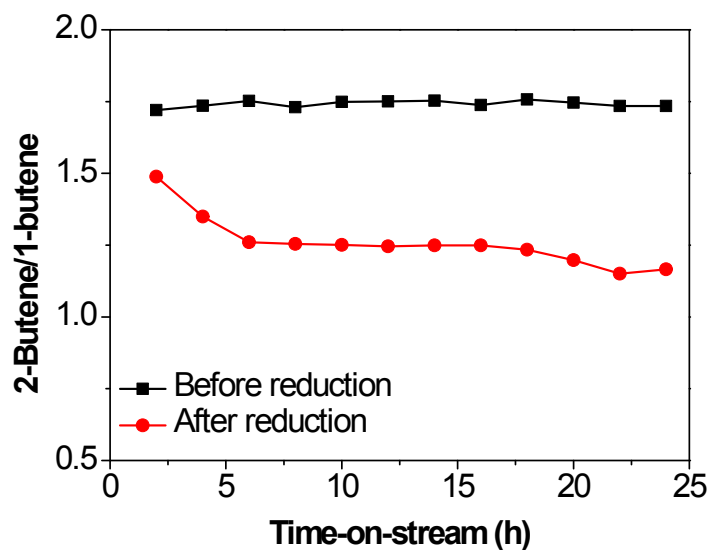

**Fig. S7.** 2-Butene/1-butene ratios obtained at different reaction time over  $\text{WO}_3\text{-SBA-15-700}$  (■) and its reduced counterpart in  $\text{H}_2$  at 550 °C for 3 h (●) (reaction conditions: 350 °C, 0.1 MPa, WHSV=1  $\text{h}^{-1}$ ).

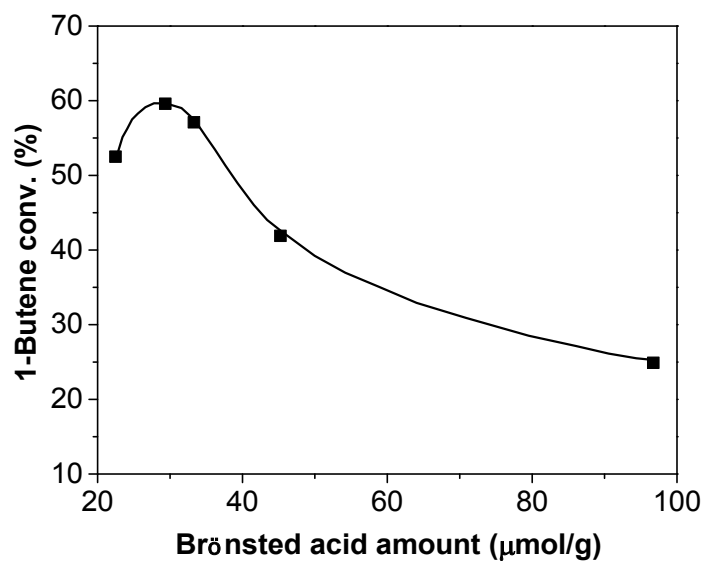

**Fig. S8.** Relationships between 1-butene conversion and Brønsted acid amount of  $\text{WO}_3\text{-SBA-15-x}$  samples.

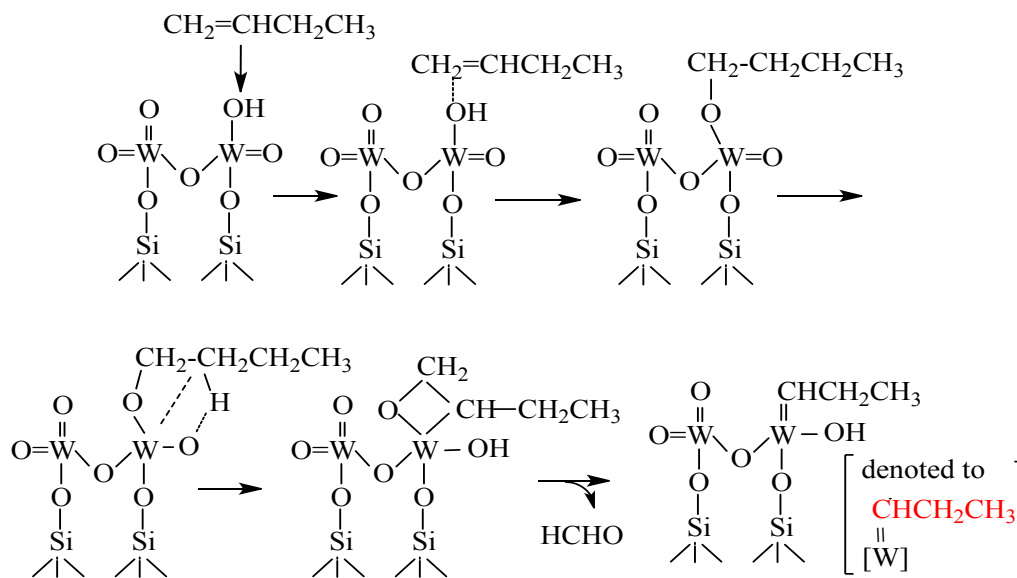

**Scheme S1.** Pathway for formation of formaldehyde and  $\text{W}=\text{CHCH}_2\text{CH}_3$  species over  $\text{WO}_3$ -SBA-15-700.

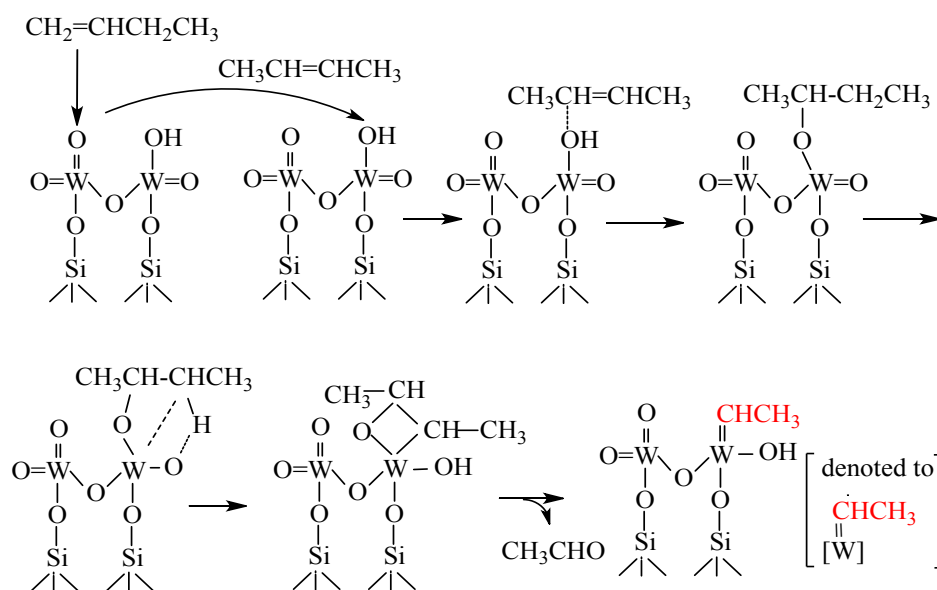

**Scheme S2.** Pathway for formation of acetaldehyde and  $\text{W}=\text{CHCH}_3$  species over  $\text{WO}_3$ -SBA-15-700.



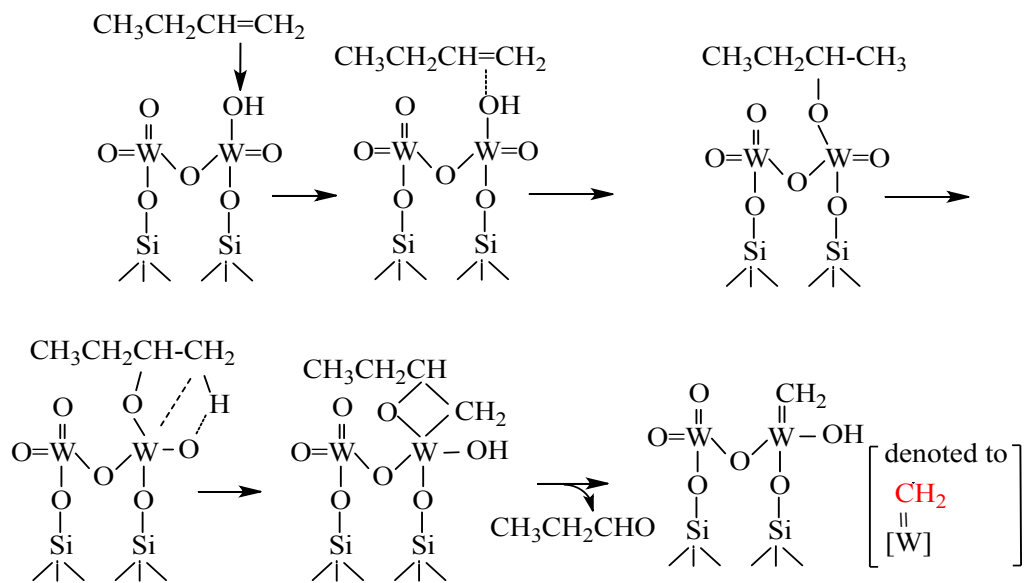

**Scheme S3.** Pathway for formation of propylaldehyde and  $\text{W}=\text{CH}_2$  species over  $\text{WO}_3$ -SBA-15-700.
